# Supplementary material
Source: PubMed Central journal article supplement (PMC3083101)
Supplement: supp_110.177220_JPET177220_Supplemental_Data.pdf [file supp_110.177220_JPET177220_Supplemental_Data.pdf]

**Supplemental Data:**

**Mechanisms Underlying Differences in Systemic Exposure of Structurally Similar Active Metabolites: Comparison of Two Preclinical Hepatic Models**

Grace Zhixia Yan, Kim L. R. Brouwer, Gary M. Pollack, Michael Zhuo Wang, Richard R. Tidwell,  
James E. Hall, Mary F. Paine

**Journal of Pharmacology and Experimental Therapeutics**

## Legends for Figures

**Supplemental Fig. S1.** Plot of the weighted residual vs. time data from the computer-generated best fit of Model 1 to the rat isolated perfused liver data depicted in Fig. 3. Pafuramidine/metabolites (A) and CPD-0868/metabolites (B) are denoted as follows: ◆ , prodrug in perfusate; □ , M1 in perfusate; ○ , M3 in perfusate; ▲ , active metabolite in perfusate; △ , active metabolite in liver. A weighting factor of  $1/y^2$  was applied.

**Supplemental Fig. S2.** Plot of the weighted residual vs. time data from the computer-generated best fit of Model 1 to the rat sandwich-cultured hepatocyte data depicted in Fig. 5. Pafuramidine/metabolites (A) and CPD-0868/metabolites (B) are denoted as follows: ◆ , prodrug in medium; □ , M1 in medium; ○ , M3 in medium; ▲ , active metabolite in medium; △ , active metabolite in hepatocytes. A weighting factor of  $1/y^2$  was applied.

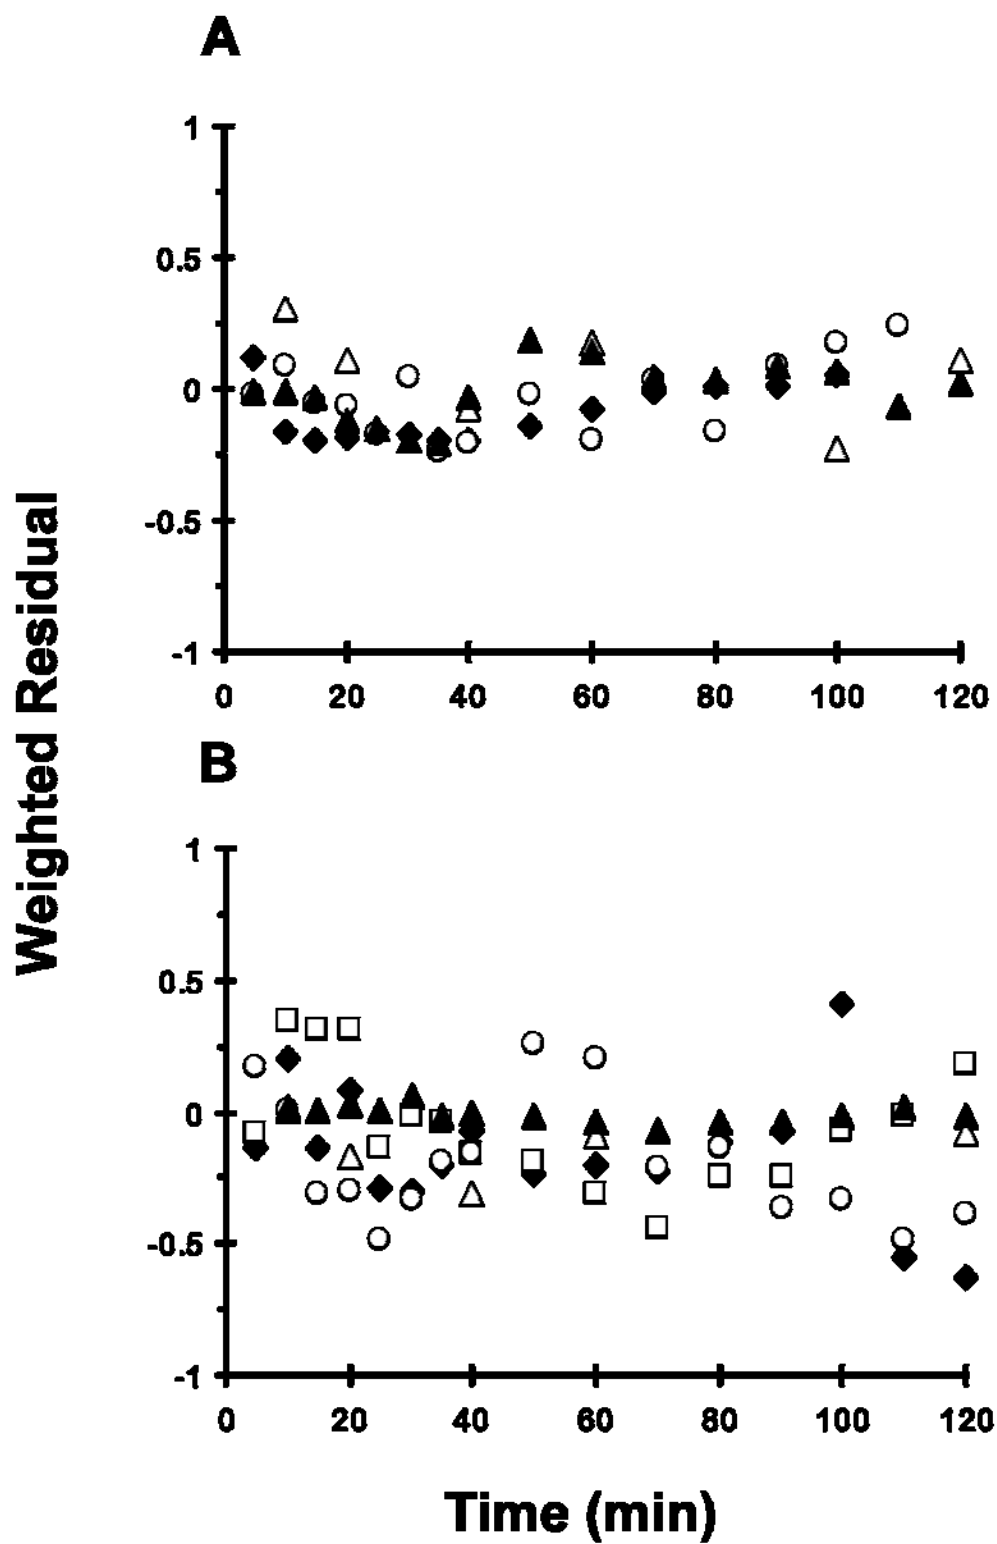**Supplemental Fig. S1**

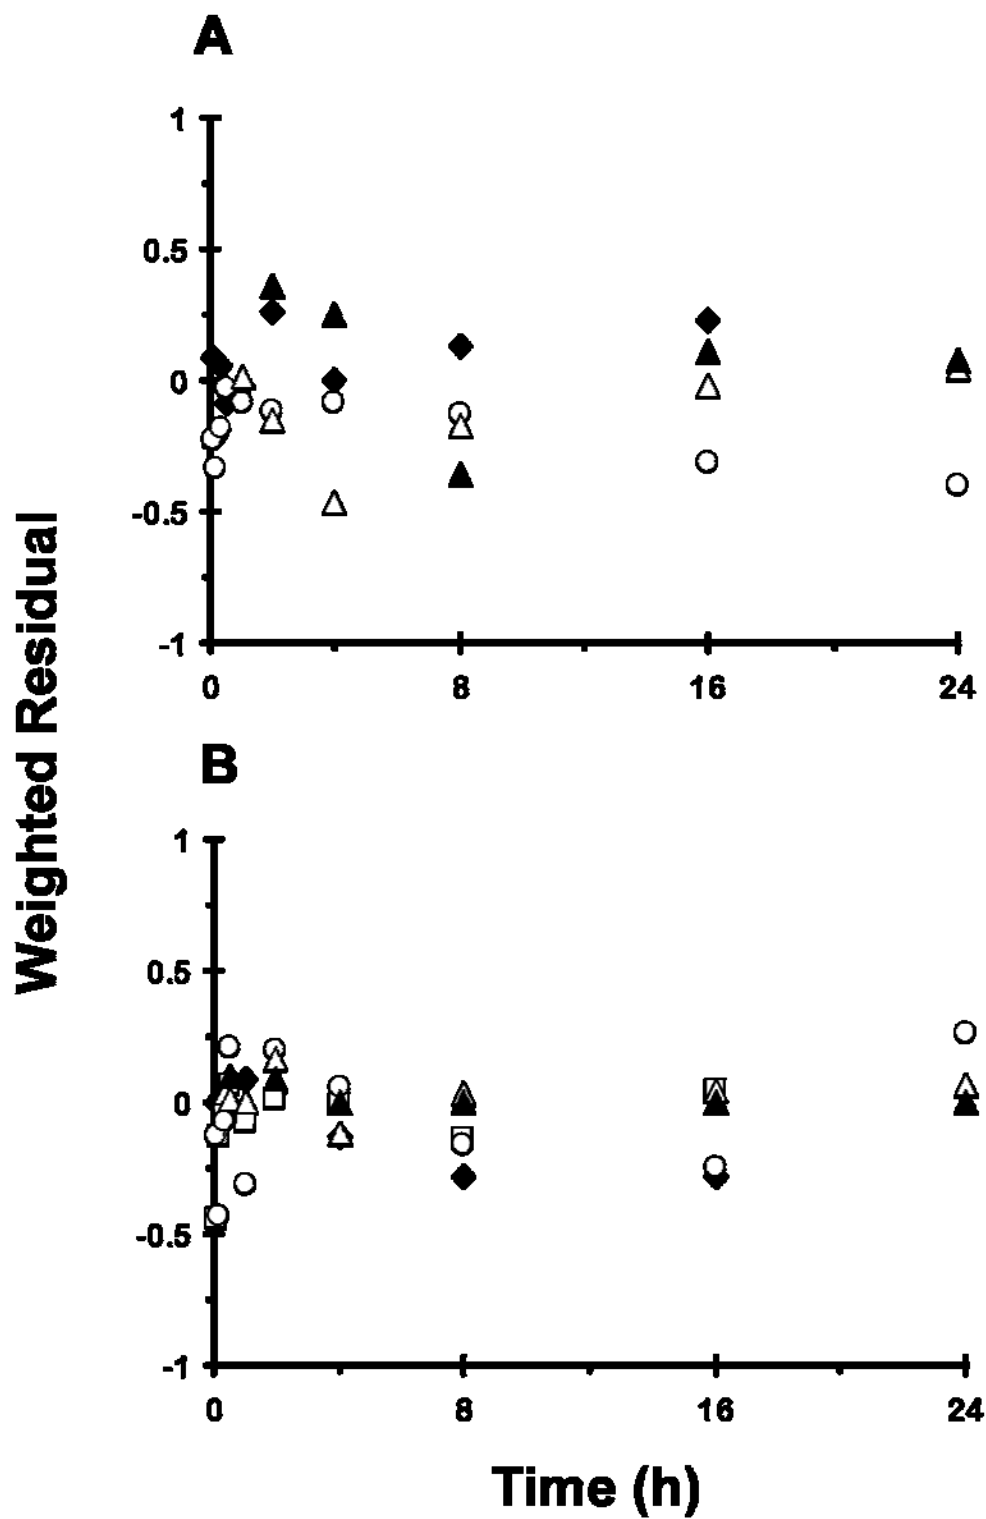**Supplemental Fig. S2**
